# Supplementary material
Source: publisher site journal article supplement (https://www.kjim.org/upload/media/kjim-2018-170-suppl5.pdf)
Supplement: Supplementary file 1 [file kjim-2018-170-suppl5.pdf]

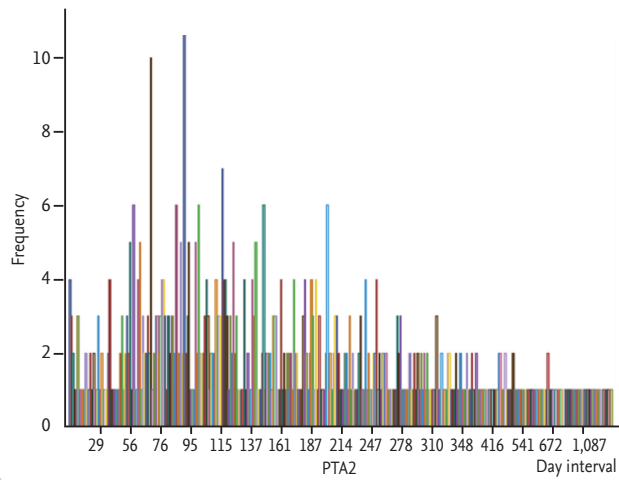

**Supplementary Figure 1.** Frequencies of the time intervals between the first and second percutaneous angioplasties. PTA, percutaneous transluminal angioplasty.
